# Supplementary material for: Transcriptome Analysis of Ochratoxin A-Induced Apoptosis in Differentiated Caco-2 Cells
Source: PubMed Central journal article supplement (PMC7020595; doi:10.3390/toxins12010023), 2019-12-31
Supplement: toxins-12-00023-s001.pdf [file toxins-12-00023-s001.pdf]

# Supplementary Materials: Transcriptome Analysis of Ochratoxin A-Induced Apoptosis in Differentiated Caco-2 Cells

Yang Xue, Yanan Gao, Qiaoyan Yan, Xiaoyu Bao, Shengguo Zhao, Jiaqi Wang and Nan Zheng

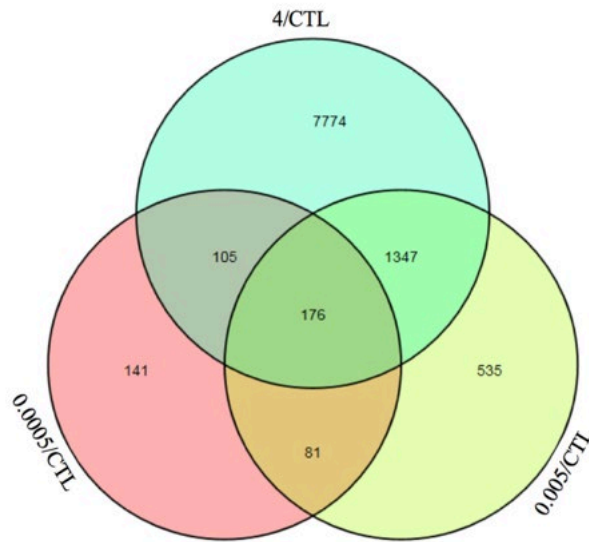

Figure S1. Venn diagram depicting the DEGs common to different dose of OTA exposure.

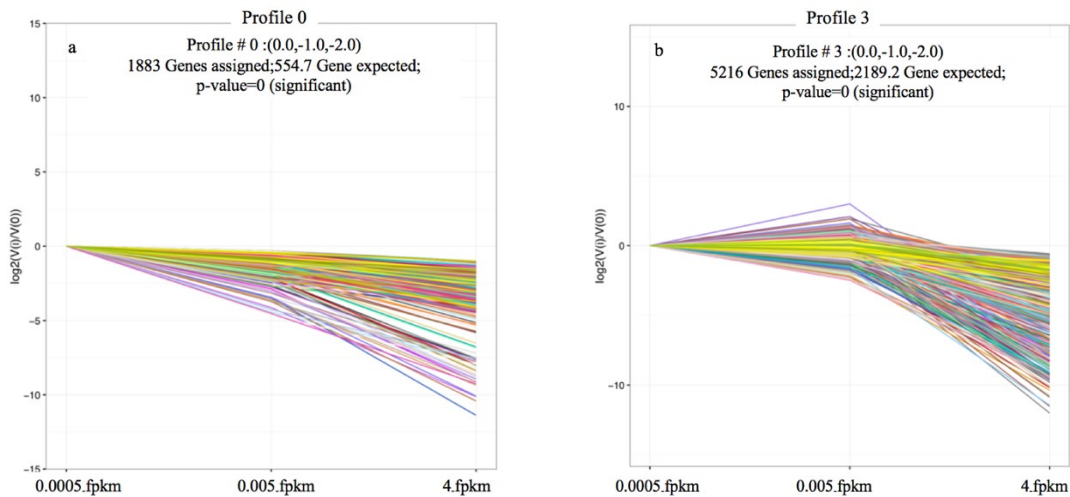

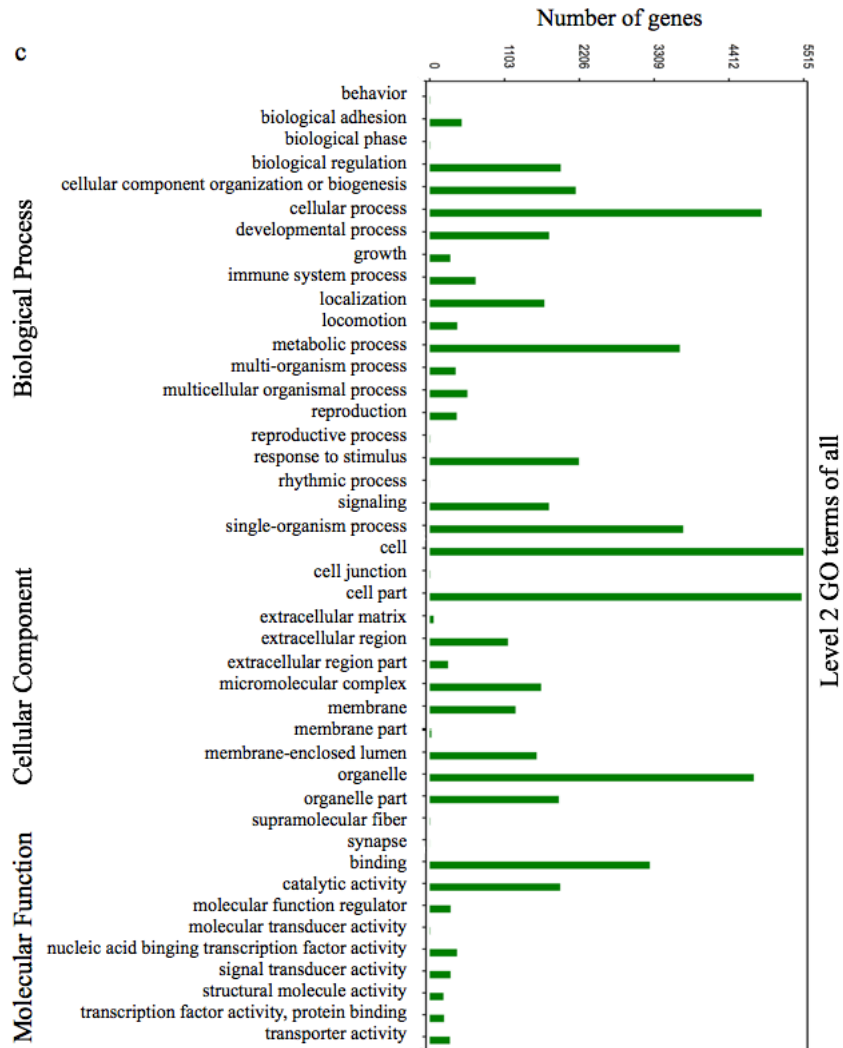

**Figure S2.** DEGs expression profiles in ochratoxin A (OTA) treated differentiated Caco-2 cells. Concentrations of 0.0005, 0.005, and 4  $\mu\text{g}/\text{mL}$  OTA were used. Profile 0 (a) and Profile 3 (b) indicating down-regulating trend during 48 h of OTA treatment, and their GO annotation (c).

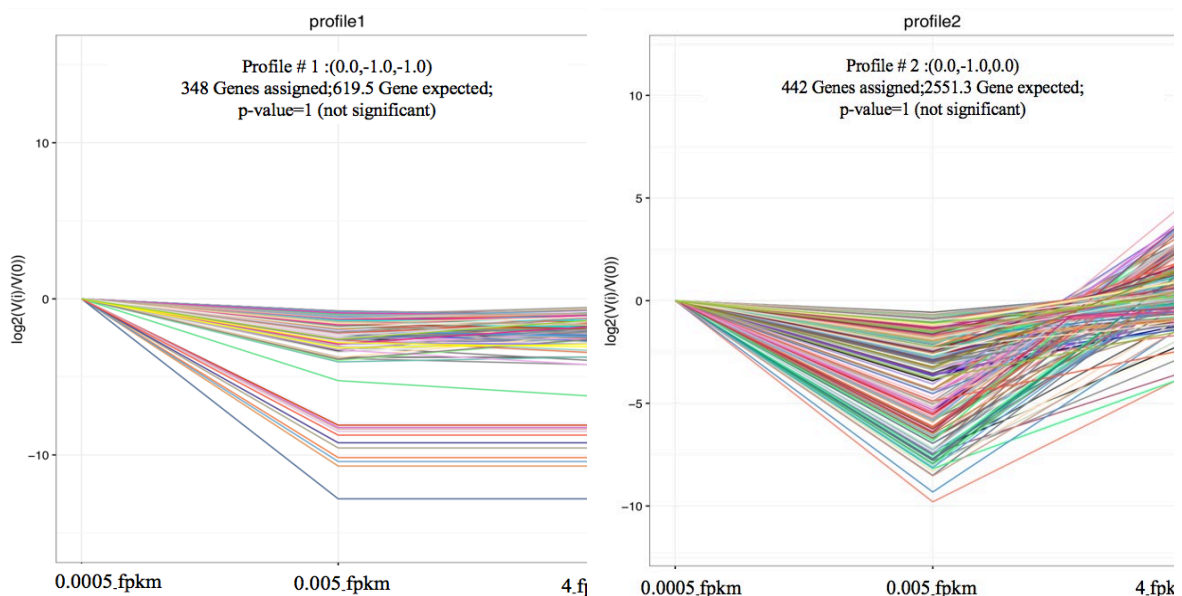

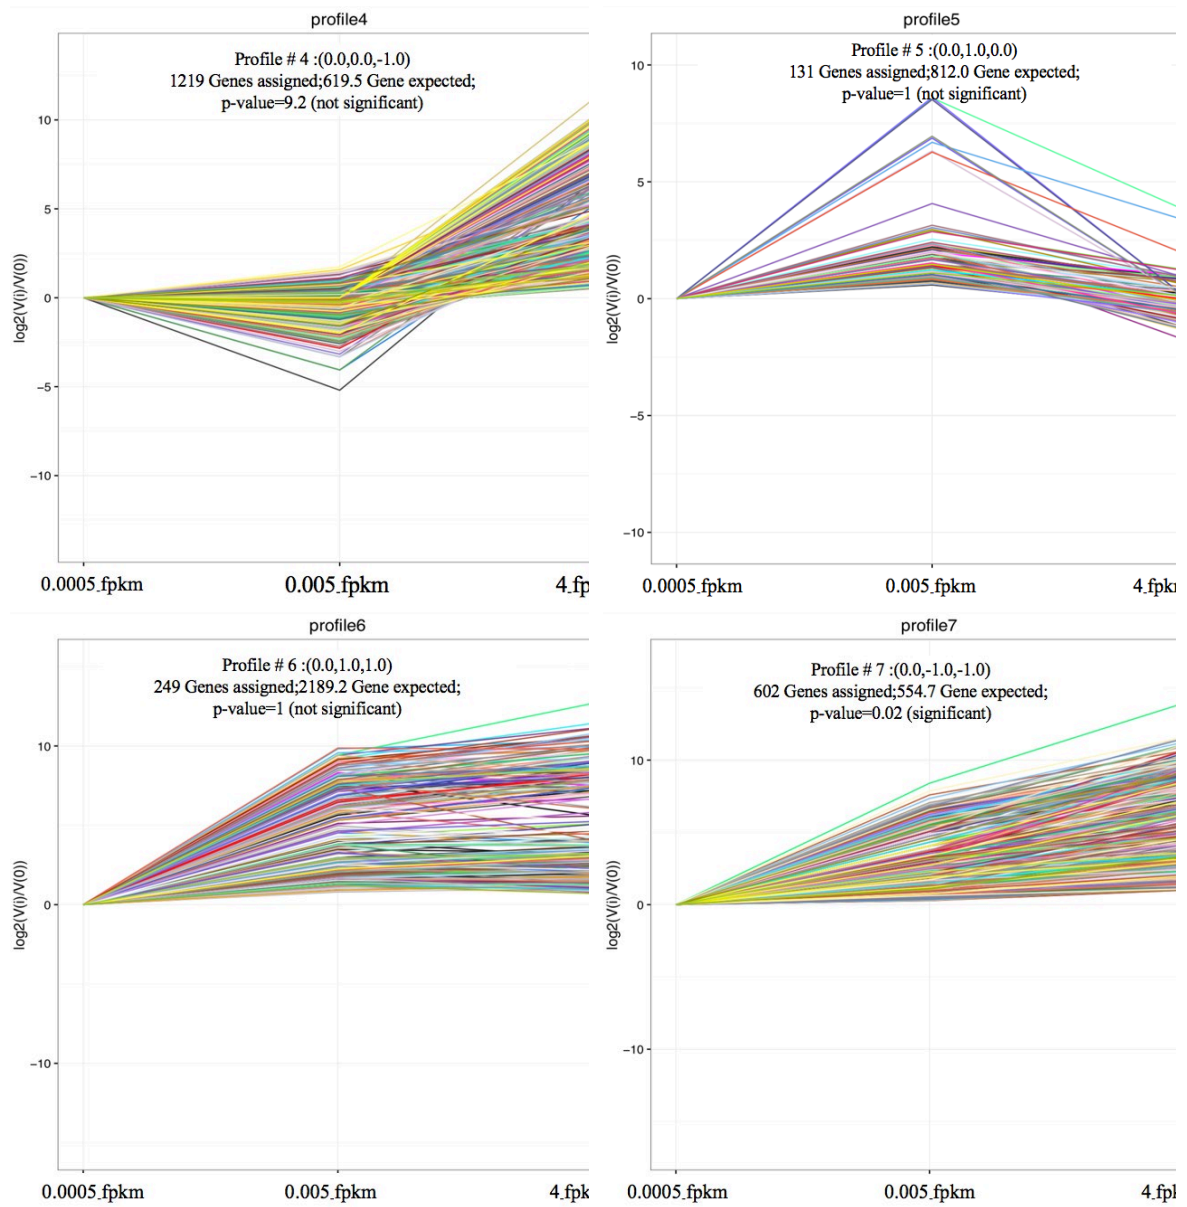

**Figure S3.** DEGs expression profile in the OTA treated differentiated Caco-2 cells. Concentrations of OTA used is 0.0005, 0.005, and 4  $\mu\text{g}/\text{mL}$ . Except for two significantly down-regulated profiles (profile 0 and 3), there are six different expression profiles (profile 1, 2, 4, 5, 6, 7).
